# Supplementary material for: Tutorial: design and fabrication of nanoparticle-based lateral-flow immunoassays
Source: Springer Nature journal article supplement (doi:10.1038/s41596-020-0357-x), 2020-10-23
Supplement: 41596_2020_357_MOESM1_ESM.pdf [file 41596_2020_357_MOESM1_ESM.pdf]

## Supplementary information

---

# Tutorial: design and fabrication of nanoparticle-based lateral-flow immunoassays

---

In the format provided by the authors and unedited

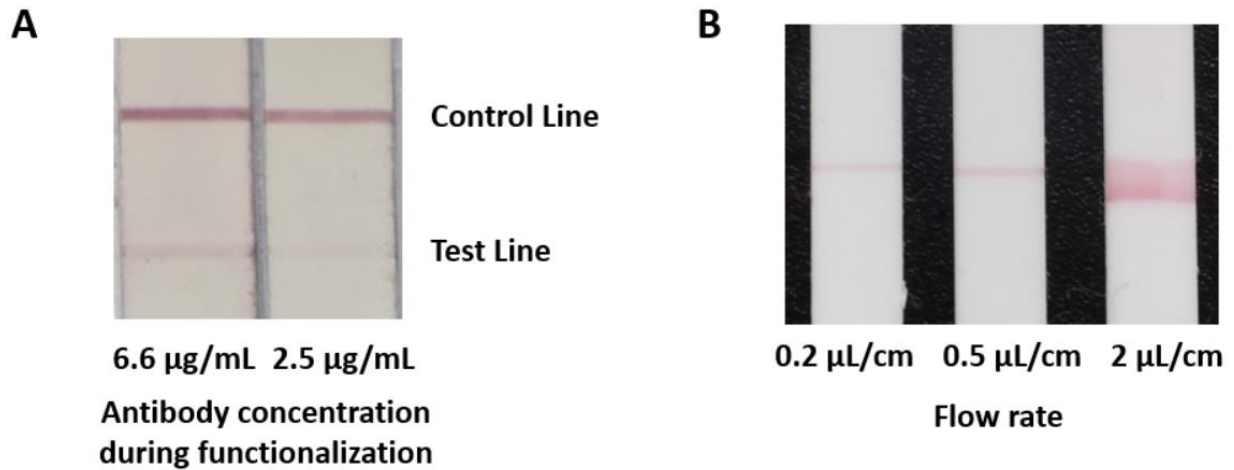

### Supplementary Fig. 1

#### Examples of how AuNP conjugation and the striping of the test line can affect the LFA signal.

**A**, Using a concentration of 6.6  $\mu\text{g/mL}$  (left) versus 2.5  $\mu\text{g/mL}$  (right) of anti-human IgG during the AuNP functionalization (steps 10–16 in Box 2) produces different signal in LFAs challenged with a blank solution (all the other parameters in the LFA fabrication were fixed). When using 6.6  $\mu\text{g/mL}$ , a higher non-specific signal (stronger red line) is produced compared to using 2.5  $\mu\text{g/mL}$ . Thus, a careful optimization of the nanoparticle conjugation can lead to consistent improvements in the overall LFA performance. **B**, By fixing the dispense speed at 50 mm/s, the use of three different flow rates during the membrane striping produces lines with different widths. As expected, using a flow rate of 2  $\mu\text{L/cm}$  generates a thicker line than those obtained using lower flow rates.

**Supplementary Table 1 – Costs associated with a single LF strip**

| <b>Material/Reagent</b>               | <b>Cost in USD per 6 mm strip</b> | <b>Material cost, USD per [unit]</b> | <b>Quantity of material per strip</b>                                                                                                                     |
|---------------------------------------|-----------------------------------|--------------------------------------|-----------------------------------------------------------------------------------------------------------------------------------------------------------|
| Laminated card                        | 0.0080                            | 0.013 [cm]                           | 6 mm                                                                                                                                                      |
| Nitrocellulose membrane               | 0.0204                            | 0.034 [cm]                           | 6 mm                                                                                                                                                      |
| Conjugate pad                         | 0.0044                            | 0.007 [cm]                           | 6 mm                                                                                                                                                      |
| Sample and Absorbent pad              | 0.0046                            | 0.004 [cm]                           | 2 x 6 mm                                                                                                                                                  |
| Antibodies for test and control lines | 0.0450                            | 75.00 [mg]                           | 2 x 0.3 $\mu$ L (1 $\mu$ g/ $\mu$ L)                                                                                                                      |
| Gold nanoparticles                    | 0.1700                            | 340.00 [g homemade AuNPs]            | 0.46 mg H <sub>2</sub> AuCl <sub>4</sub><br>12.5 mg sodium citrate                                                                                        |
| Conjugate pad buffer                  | 0.0031                            | 0.35 [g salts mixture]               | 1 mg Na <sub>2</sub> [B <sub>4</sub> O <sub>5</sub> (OH) <sub>4</sub> ] $\cdot$ 8H <sub>2</sub> O<br>1 mg H <sub>3</sub> BO <sub>3</sub><br>60 mg sucrose |
| Antibodies for conjugate              | 0.1416                            | 140.00 [mg]                          | 10 $\mu$ L (0.1 $\mu$ g/ $\mu$ L)                                                                                                                         |
| Sample pad buffer                     | 0.0047                            | 0.45 [g salts mixture]               | 1 mg NaH <sub>2</sub> PO <sub>4</sub><br>1 mg Na <sub>2</sub> HPO <sub>4</sub><br>0.5 $\mu$ L Tween 20<br>25 mg BSA                                       |
| <b>Total</b>                          | <b>0.4018</b>                     |                                      |                                                                                                                                                           |

This estimation is based on the product prices provided by suppliers in 2019 and considering a 6 mm wide strip. To the final cost of a single LFA of 0.4018 \$ must be added the cost for the dispenser (which can be around 20,000.00 \$, but can be even lower for lab scale applications), the storing containers (aluminium pouch and desiccating agents) and the salary of personnel/facility (not estimable since it may vary significantly between countries).
